# Supplementary material
Source: Springer Nature journal article supplement (https://www.springermedizin.de/resource/supplementary/12889_2011_4032_MOESM3_ESM.pdf/9491260)
Supplement: MOESM3 [file 9491260]

## ENVELOPE OF CHILDHOOD DIARRHEA

### MILD CASES\*

64.8%

Mean duration: 4.3 d

Persistent: 4.9%

Any dehydration: 7.3%

### MODERATE CASES\*\*

34.7%

Mean duration: 6.4 d

Persistent: 15.4%

Any dehydration: 51.4%

### SEVERE CASES^

0.5%

Mean duration: 8.4 d

Persistent: 11.1%

Any dehydration: 84.6%

\* Mild cases defined as the proportion not seeking care according to DHS report of the average proportion of children  $\leq 35$  mos with diarrhea for whom care was not sought in the 2 weeks prior to survey. Duration & severity outcomes described by community-based studies.

\*\* Moderate cases defined as the proportion seeking care according to DHS report of the average proportion of children  $\leq 35$  mos with diarrhea for whom care was sought in the 2 weeks prior to survey. Any dehydration and proportion persistent described by hospital outpatient studies; mean duration estimated by averaging mean duration of mild and severe cases.

^ Severe cases defined as the proportion of moderate cases with severe dehydration (1.4%). Duration & severity outcomes described by hospital inpatient studies.
